# Supplementary material for: Theoretical insights into Z-scheme BAs/GeC van der Waals heterostructure for high-efficiency solar cell
Source: Royal Society of Chemistry journal article supplement (doi:10.1039/d4ra08369e), 2024-01-01
Supplement: d4ra08369e1.pdf [file d4ra08369e1.pdf]

## Supporting Information

### Theoretical Insights into Z-Scheme BAs/GeC van der Waals Heterostructure for High-Efficiency Solar Cell.

Khawla Chaoui <sup>a,\*</sup>, Kamel Zanat <sup>a</sup>, Warda Elaggoune <sup>b</sup>, Luc Henrard <sup>c</sup>, Mohamed Achehboune <sup>c</sup>.

<sup>a</sup> Guelma Physics Laboratory (GPL), Département des sciences de la matière, Faculté des mathématiques, de l'informatique et des sciences de la matière, Université 8 Mai 1945, BP 401, Guelma, Algeria.

<sup>b</sup> Laboratoire de Physique des Matériaux (L2PM), Faculté des mathématiques, de l'informatique et des sciences de la matière, Université 8 Mai 1945, BP 401, Guelma, Algeria.

<sup>c</sup> Department of Physic, Namur Institute of Structured Matter, University of Namur, Rue de Bruxelles 61, 5000, Namur, Belgium.

\*Electronic mail : chaoui.khawla@univ-guelma.dz

**Keywords:** First-principles calculations; 2D heterostructures; Z-scheme band alignment; Biaxial strain; Photovoltaic applications.

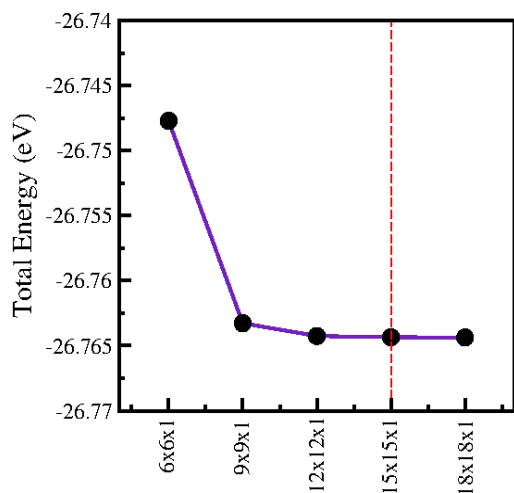

(a)

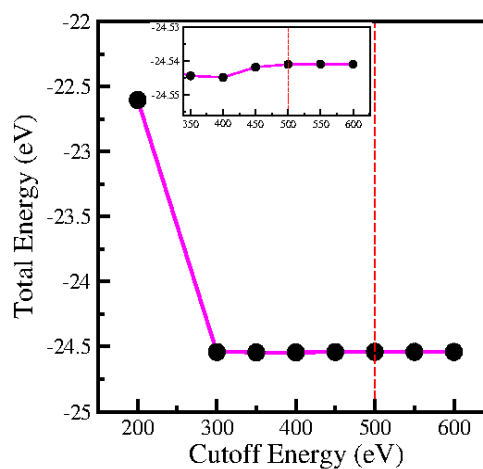

(b)

**S1** The variation of total energy as a function of (a) Kpoints (b) cutoff using HSE06 functional.

## S2 Optical properties under biaxial tensile strain

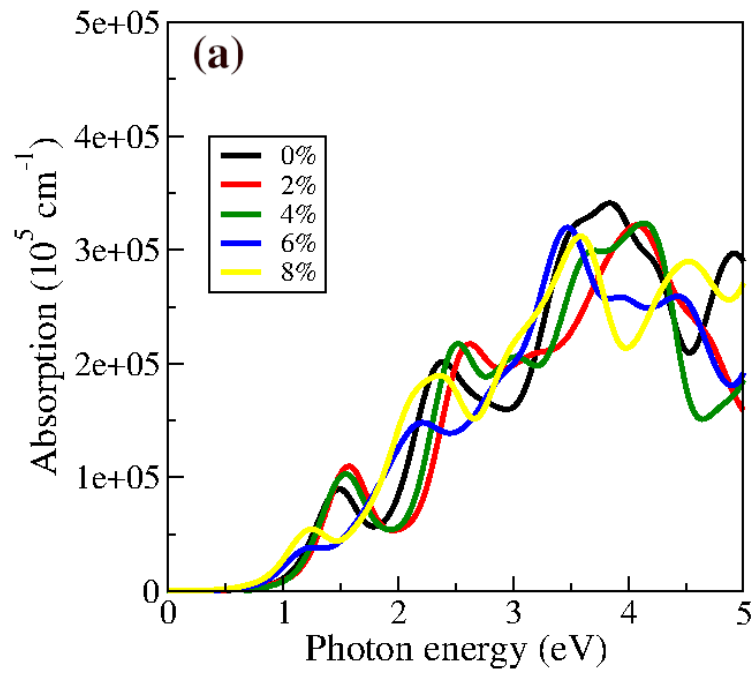

The variation of the absorption of BA/GeC heterostructure under biaxial tensile strain.
